# Supplementary material for: Dopamine oxidation promoted by human telomeric DNA models in the presence of a Cu(ii) terpyridine chelate
Source: Royal Society of Chemistry journal article supplement (doi:10.1039/d3cc05530b), 2023-11-30
Supplement: d3cc05530b1.pdf [file d3cc05530b1.pdf]

## Supplementary Information

### Dopamine oxidation promoted by human telomeric DNA models in the presence of a Cu(II) terpyridine chelate

Yu Bao,<sup>ab</sup> Wenqin Zhou,<sup>bcd</sup> Wenhui Miao,<sup>bc</sup> Guoqing Jia<sup>\*b</sup> and Can Li<sup>\*b</sup>

a. School of Physical Science and Technology, ShanghaiTech University, No. 393 Middle Huaxia Road, Shanghai, 201210, China.

b. State Key Laboratory of Catalysis, Dalian Institute of Chemical Physics, Chinese Academy of Science, Dalian 116023, China.

c. University of Chinese Academy of Science, No.19A Yuquan Road, Beijing, 100049, China.

d. Zhang Dayu School of Chemistry, Dalian University of Technology, No.2 Linggong Road, Dalian 116024, China

## Material and Methods

### DNA Samples and Chemicals.

DNA oligonucleotides of human telomere: G-rich single strand (HT21G 5'-GGG TTA GGG TTA GGG TTA GGG-3') and C-rich single strand (HT21C 5'-CCC TAA CCC TAA CCC TAA CCC-3'), were purchased from Sangon Biotech, Co., Ltd. in a HPLC-purified form. Human telomeric double strand (HT21D) is obtained by hybrid of equimolar HT21G and HT21C. The DNA strand concentration was determined by measuring the UV absorbance at 260nm with the corresponding extinction coefficient provided by the manufacturer. All DNA were heated in 50 mM HEPES buffer (pH 7.5) for 3 min at 95 °C and cooled at 0.5 °C/min to room temperature and then incubated at 4 °C before use. The synthesis details of Terpyridine-Cu(II) complex(CuL2-T) can be obtained from our previous report (Chem. Sci. 2015, 6, 5578). Dopamine hydrochloride(CAS: 62-31-7, 99%) was purchased from Alfa Aesar. 4-(2-hydroxyethyl)piperazine-1-erthanesulfonic acid (HEPES) (CAS: 7365-45-9, 99.5%, Aladdin) was dissolved in H<sub>2</sub>O to 50 mM. H<sub>2</sub>O<sub>2</sub>(CAS: 7722-84-1, 30%) was purchased from Kermel. All chemicals were used without further purification. Milli-Q water (18.2 MΩ·cm) was used for all experiments.

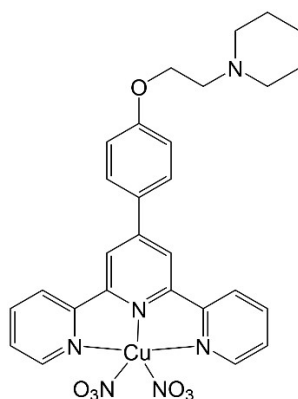

Structure of CuL2-T ( L2: 4'-(4-(2-(piperidin-1-yl)ethoxy)phenyl)-2,2':6',2''-terpyridine )

### Circular Dichroism (CD) Spectroscopy

Circular dichroism (CD) experiments were carried out on a dual beam DSM 1000 CD spectrophotometer (Olis, Bogart, GA) equipped with a Peltier temperature controller, using a quartz cell of 1.0-cm path length and 2.7 mL volume. The scanning rate was automatically selected by the Olis software as a function of the signal intensity to optimize data collection. The spectra were recorded from 220 to 420nm at 20°C and subtracted the background CD spectrum of the HEPES buffer (50mM, pH 7.5).

### **Non-denaturing polyacrylamide gel electrophoresis (PAGE)**

DNA samples were incubated in TBE buffer (90 mM Tris, 90mM borate, 2 mM EDTA, pH 7.5). 10 $\mu$ L samples were loaded on the gel. Samples were run on a 20% native polyacrylamide gel (7 cm  $\times$  10 cm), made up in 1 $\times$ TBE buffer containing 20 mM KCl(90 mM Tris, 90mM borate, 2mM EDTA, pH 7.5) for 3 hours at 100 V. Gels were stained with Stains-all (Sigma, 95%) and then destained under the sunlight. Gel pictures were taken by the camera of smart-phone and without any further processing.

### **Monitoring the Oxidation of Dopamine.**

The annealed DNA samples (50  $\mu$ M) were prepared in HEPES buffer (pH=7.5), and incubated with CuL2-T for 30 minutes at 25 °C. After the formation of HT21/CuL2-T complexes, dopamine was added, and then H<sub>2</sub>O<sub>2</sub> was added to start the reaction. The oxidation of dopamine were tracked by the product formations *via* monitoring the absorbances of 480 nm using a Shimadzu 2600 spectrophotometer. The samples were measured in a quartz cell of 1-cm path length and the total volume of reaction system is 500  $\mu$ L.

The  $k_{\text{obs}}$  was obtained from the slope of the initial linear portion (the first 10 seconds) of the plot of absorbance versus reaction time.

### **Dissociation constant ( $K_d$ ) measurement.**

According to the binding of other copper(II) complexes to the telomeric DNA,<sup>1-3</sup> we use UV-visible spectrophotometric titration experiments to calculate the

dissociation constant( $K_d$ ) of three human telomeric DNA and CuL2-T. A spectrophotometric titration of 40  $\mu$ M CuL2-T with increasing concentrations of DNA in 0 to 30  $\mu$ M range was performed. The titration was stop until no change of absorbance at  $\lambda=332$  nm. The saturation curves for the binding of CuL2-T with DNA were determined by plotting fraction of bound CuL2-T ( $\alpha$ , determined by equation 1) as a function of DNA concentration and fitting with a one-site binding model to get the  $K_d$  value for three DNA:

$$\alpha = \frac{A_x - A_0}{A_\infty - A_0} \quad (1)$$

where  $A_x$  is the absorbance at  $\lambda=332$  nm of CuL2-T incubated with varied concentration of DNA,  $A_\infty$  and  $A_0$  are the absorbances at  $\lambda=332$  nm in the presence of saturating DNA and in the absence of DNA, respectively. Data was fitted by Hill equation by Origin software, and  $K_d$  of CuL2-T with DNA could be got from the fitting result.

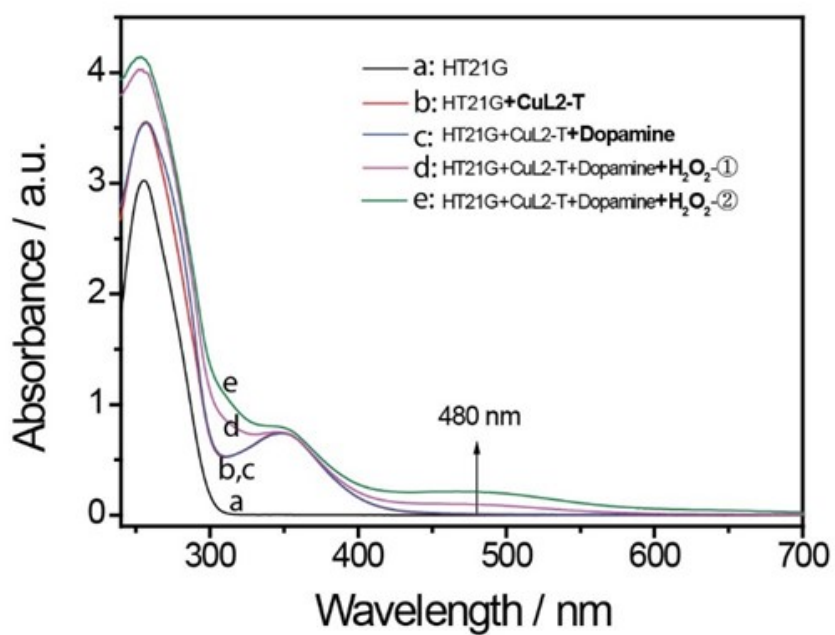

**Figure S1** UV-visible spectra of (a) HT21G(50 $\mu$ M), (b) its complex with CuL2-T(300 $\mu$ M), (c) the subsequent addition of dopamine(0.5mM), and (d, e), the final addition of H<sub>2</sub>O<sub>2</sub> (20mM) to initiate the reaction. With the addition of H<sub>2</sub>O<sub>2</sub>, dopamine undergoes an oxidation reaction, evidenced by the appearance of absorbance at 480nm ascribed to oxidation product aminochrome.

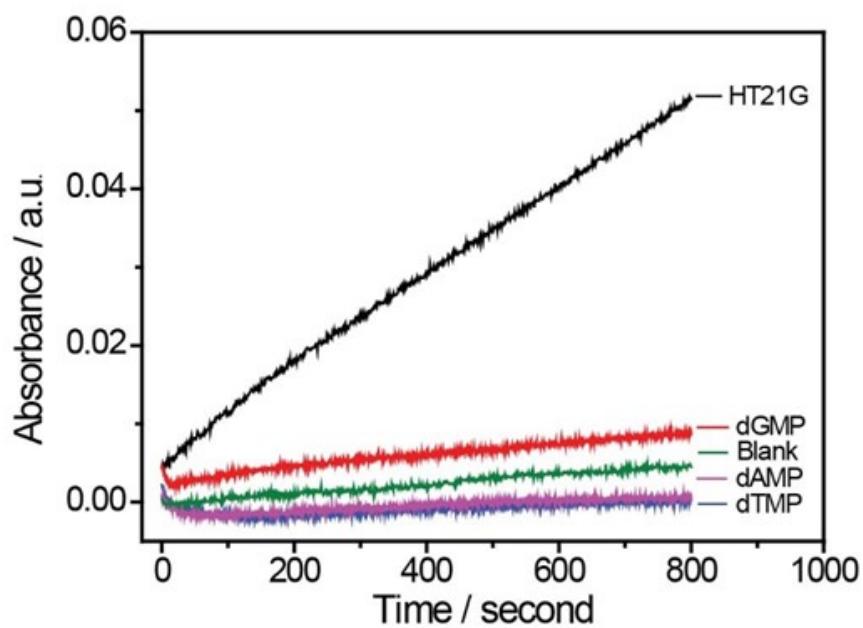

**Figure S2** DA oxidation promoted by HT21G(50 $\mu$ M) and its component nucleotides of dGMP, dAMP and dTMP with the concentration of 1.05mM (21\*50 $\mu$ M). Blank refers to the DA autooxidation in the presence of H<sub>2</sub>O<sub>2</sub>. HEPES (50mM, pH=7.5), DA (0.5 mM) and H<sub>2</sub>O<sub>2</sub> (20 mM) was used here.

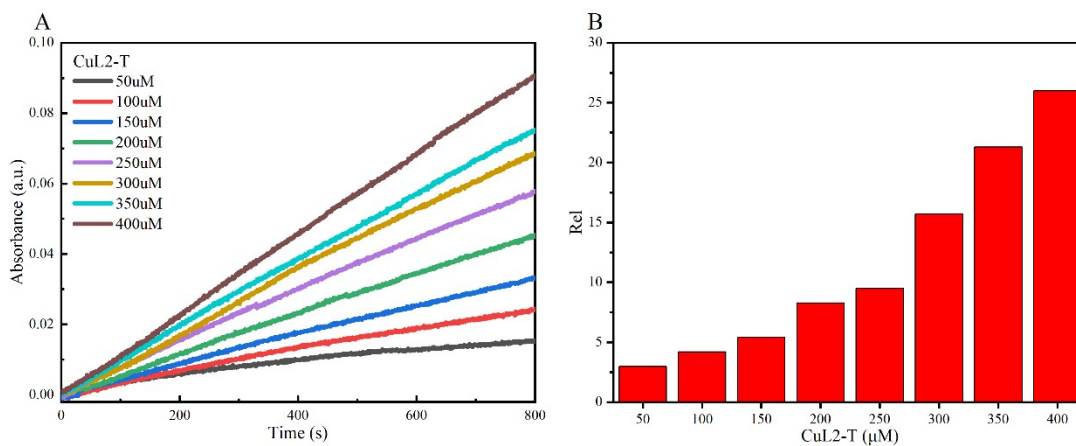

**Figure S3** DA oxidation promoted by CuL2-T. A) UV-vis kinetic curve of dopamine oxidation by H<sub>2</sub>O<sub>2</sub>, in the presence of different concentration of CuL2-T; B) The plot of relative  $k_{\text{obs}}$  against the different concentration of CuL2-T for promoting DA oxidation.  $\text{Rel} = k_{\text{obs}}(\text{CuL2-T}) / k_{\text{obs}}(\text{blank})$ . All reaction were performed in HEPES buffer(50mM, pH=7.5), DA(0.5mM), H<sub>2</sub>O<sub>2</sub>(20mM), CuL2-T(50-400μM) were used here.

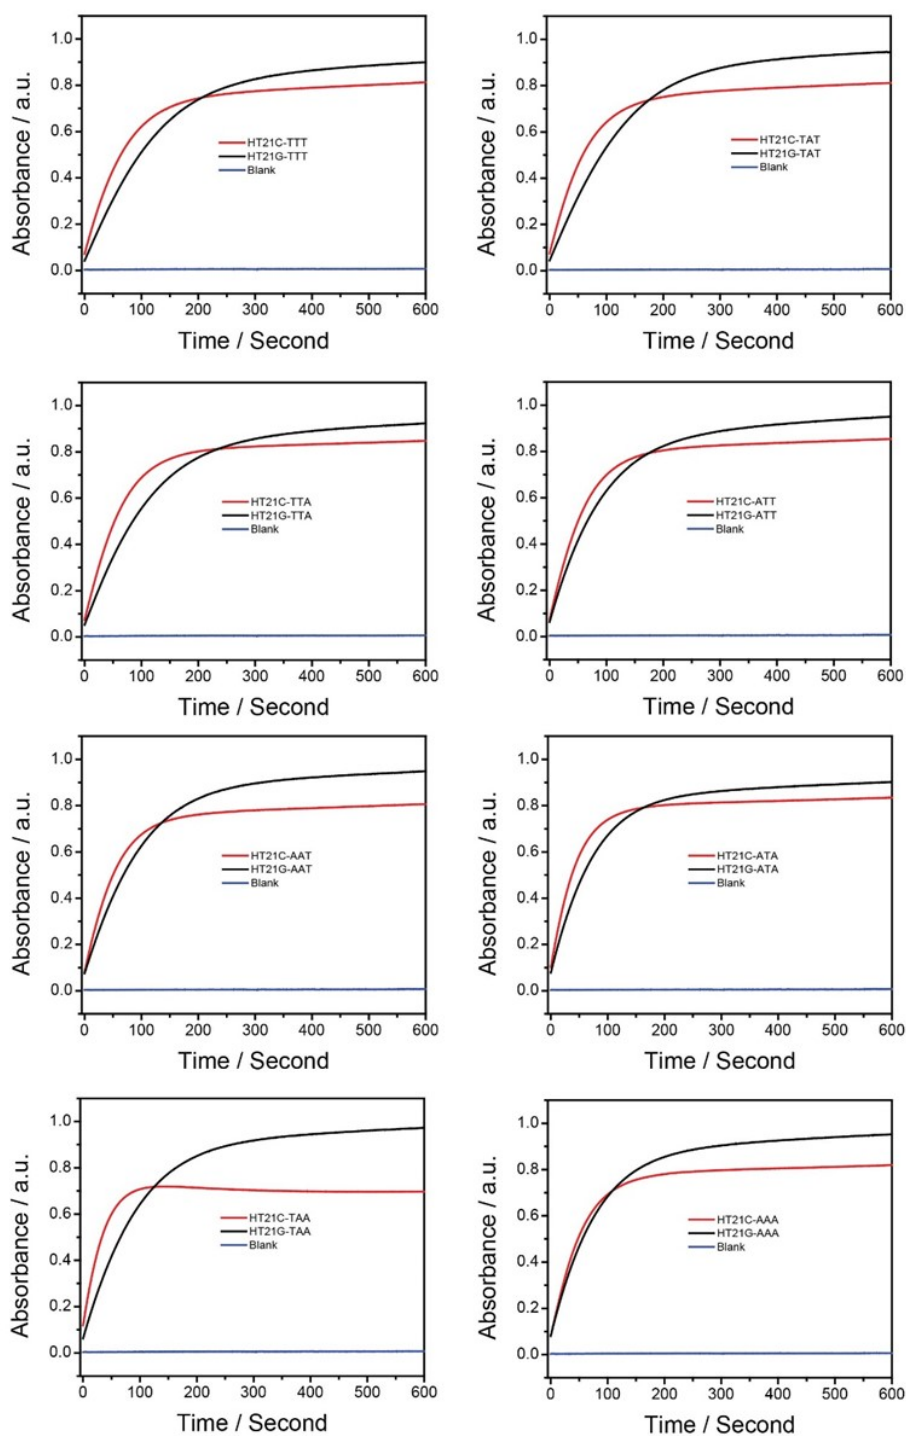

**Figure S4** DA oxidation promoted by different loop base sequence of HT21G/C(50 $\mu$ M). Assembly of HT21G and HT21C with CuL2-T in the molar ratio of 1:6 was used here. Blank refers to the DA autooxidation in the presence of H<sub>2</sub>O<sub>2</sub>. The  $k_{obs}$  was calculated by the slope of the line fitted to increase of absorbance change within first 10 second (Table S2). HEPES (50mM, pH=7.5), DA (0.5 mM) and H<sub>2</sub>O<sub>2</sub> (20 mM) was used here.



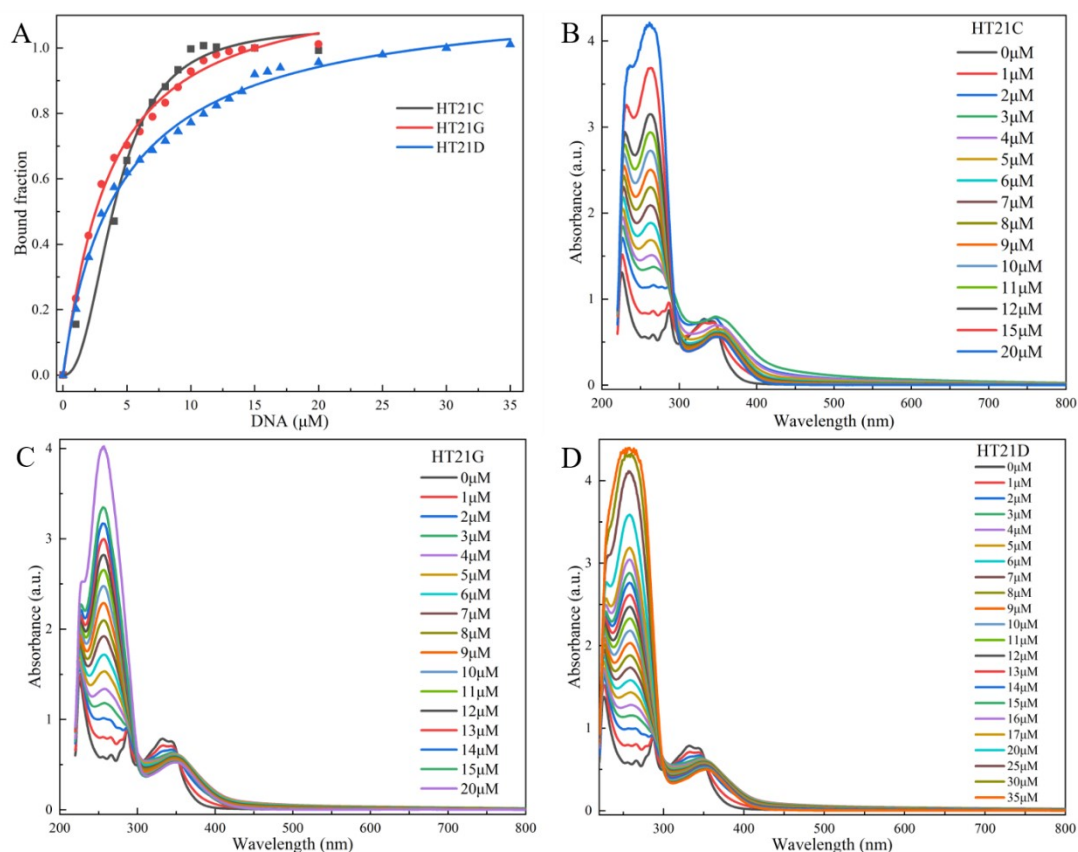

**Figure S5** The dissociation constants ( $K_d$ ) measurement. (A) Plots of bound fraction of CuL2-T to DNA versus DNA concentration. (B-D) UV-vis spectrum of HT21C, HT21G and HT21D titration to CuL2-T. Measurement were performed with CuL2-T (40 $\mu\text{M}$ ) in 50mM HEPES buffer (pH=7.5) at 25°C.

Note: According to the UV-vis titration experiment, the dissociation constants ( $K_d$ ) of CuL2-T to HT21G, HT21C and HT21D were calculated as  $3.47 \pm 0.32 \mu\text{M}$ ,  $4.11 \pm 0.24 \mu\text{M}$  and  $4.68 \pm 0.37 \mu\text{M}$ , respectively, indicating a binding affinity sequence of HT21G > HT21C > HT21D. This is in contrast to the case of HTDNA-CuL2-T promoted DA oxidation (HT21C > HT21G > HT21D). Therefore, the different oxidation rate is not due to the different binding ability of HT21G, HT21C and HT21D with CuL2-T.

**Table S1** The  $k_{\text{obs}}$  of different additives for promoting DA oxidation

|                | HT21G ( $\times 10^{-6}$ ) | HT21C ( $\times 10^{-6}$ ) | HT21D ( $\times 10^{-6}$ ) |
|----------------|----------------------------|----------------------------|----------------------------|
| Blank          | 10.01 $\pm$ 3.76           | 10.01 $\pm$ 3.76           | 10.01 $\pm$ 3.76           |
| CuL2-T         | 264.6 $\pm$ 3.96           | 264.6 $\pm$ 3.96           | 264.6 $\pm$ 3.96           |
| DNA alone      | 174.9 $\pm$ 5.86           | 361.3 $\pm$ 4.18           | 273.9 $\pm$ 6.35           |
| DNA:CuL2-T=4:1 | 633.9 $\pm$ 4.16           | 451.2 $\pm$ 5.20           | 37.85 $\pm$ 4.66           |
| DNA:CuL2-T=2:1 | 1030 $\pm$ 5.04            | 1170 $\pm$ 5.54            | 39.22 $\pm$ 6.82           |
| DNA:CuL2-T=1:1 | 1820 $\pm$ 6.56            | 1900 $\pm$ 7.11            | 241.6 $\pm$ 5.12           |
| DNA:CuL2-T=1:2 | 2950 $\pm$ 9.23            | 4490 $\pm$ 21.32           | 565.7 $\pm$ 6.27           |
| DNA:CuL2-T=1:4 | 4120 $\pm$ 9.29            | 7720 $\pm$ 37.39           | 1650 $\pm$ 14.33           |
| DNA:CuL2-T=1:5 | 5300 $\pm$ 6.76            | 9270 $\pm$ 38.46           | 1860 $\pm$ 5.02            |
| DNA:CuL2-T=1:6 | 4980 $\pm$ 5.37            | 9610 $\pm$ 30.55           | 1910 $\pm$ 1.55            |
| DNA:CuL2-T=1:7 | 5430 $\pm$ 5.12            | 8470 $\pm$ 7.62            | 3650 $\pm$ 10.99           |
| DNA:CuL2-T=1:8 | 6270 $\pm$ 4.50            | 8480 $\pm$ 6.47            | 4690 $\pm$ 12.08           |

The change of absorbance at 480nm within first 10 second was used to calculate the  $k_{\text{obs}}$ . Blank refers to the DA autooxidation in the presence of  $\text{H}_2\text{O}_2$ .

**Table S2** The  $k_{\text{obs}}$  of different loop base sequence HT21G/C for promoting DA oxidation

|       | HT21G( $\times 10^{-6}$ ) | HT21C( $\times 10^{-6}$ ) |
|-------|---------------------------|---------------------------|
| Blank | 10.01 $\pm$ 3.76          | 10.01 $\pm$ 3.76          |
| TTT   | 5560 $\pm$ 5.13           | 8460 $\pm$ 29.50          |
| TAT   | 575 $\pm$ 7.06            | 900 $\pm$ 30.26           |
| TTA   | 6210 $\pm$ 7.29           | 9410 $\pm$ 23.48          |
| ATT   | 8040 $\pm$ 21.94          | 9900 $\pm$ 27.14          |
| AAT   | 7370 $\pm$ 14.97          | 10170 $\pm$ 43.02         |
| ATA   | 9060 $\pm$ 34.18          | 12390 $\pm$ 64.33         |
| TAA   | 7980 $\pm$ 21.74          | 13280 $\pm$ 97.78         |
| AAA   | 8990 $\pm$ 35.21          | 10430 $\pm$ 32.08         |

The change of absorbance at 480nm within first 10 second was used to calculate the  $k_{\text{obs}}$ . Blank refers to the DA autooxidation in the presence of H<sub>2</sub>O<sub>2</sub>.
